# Supplementary material for: Protein–polyelectrolyte complexation: effects of sterically repulsive groups, macromolecular architecture and hierarchical assembly
Source: Royal Society of Chemistry journal article supplement (doi:10.1039/d4sm01254b), 2024-12-06
Supplement: d4sm01254b1.pdf [file d4sm01254b1.pdf]

## **Protein-Polyelectrolyte Complexation – Effects of Sterically Repulsive Groups, Macromolecular Architecture and Hierarchical Assembly**

*Raman Hlushko, Alexander Marin and Alexander K. Andrianov*

Institute for Bioscience and Biotechnology Research, University of Maryland, Rockville, MD 20850  
USA

### ***Supplementary Information***

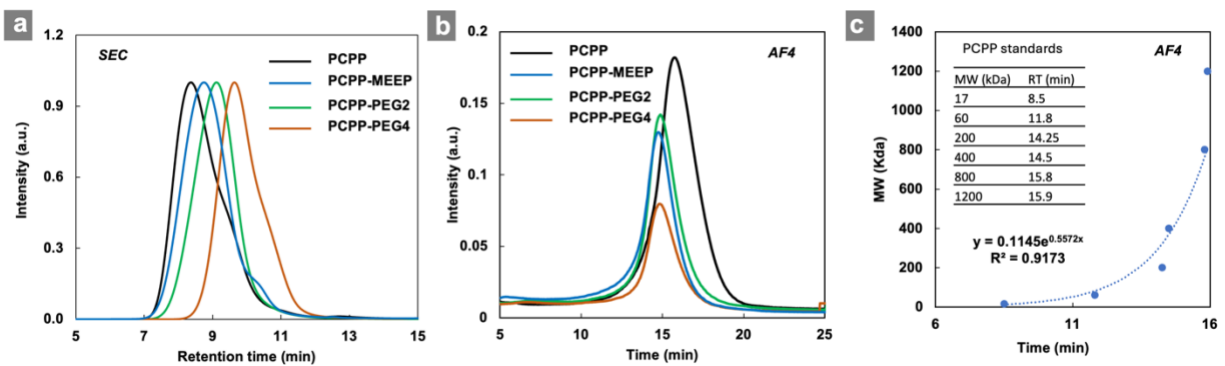

**Fig. S1.** (a) DLS profiles, (b) AF4 fractograms of PCPP, PCPP-MEEP, PCPP-PEG2 and PCPP-PEG4 and (c) AF4 calibration curves using PCPP standards (0.5 mg/mL polymer, 50 mmol phosphate buffer, pH 7.4).

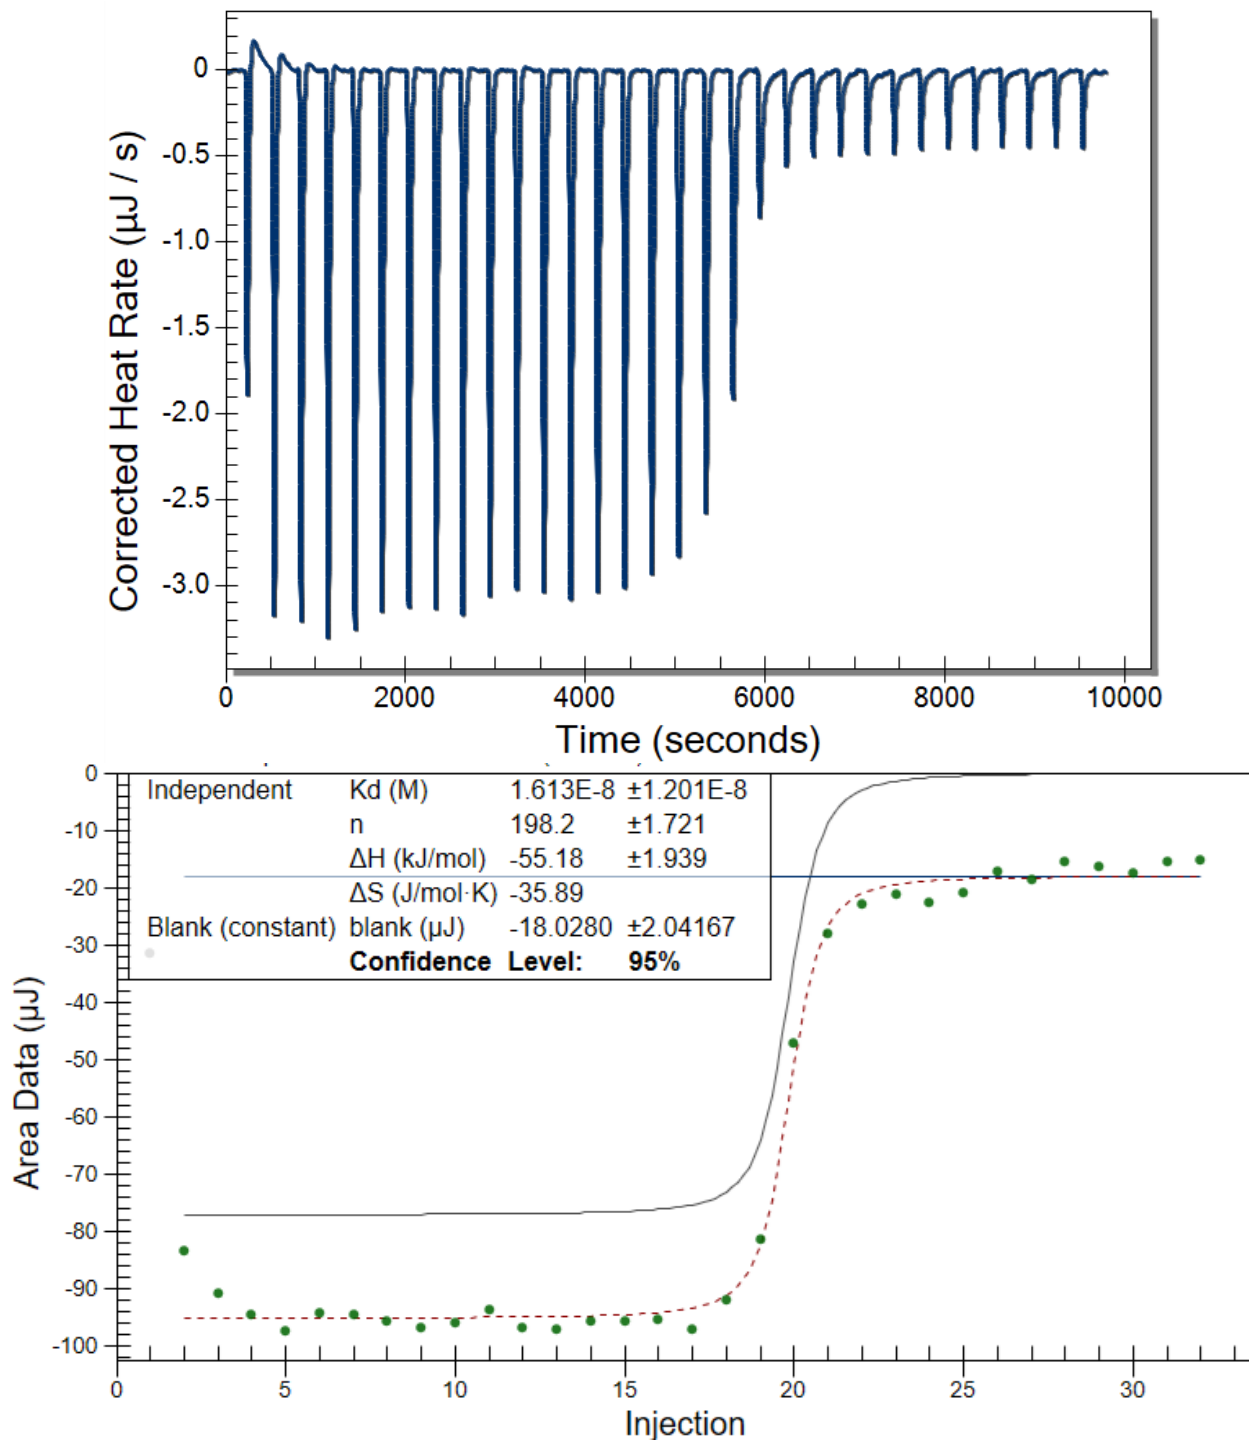

**Fig. S2.** ITC titration of PCPP with lysozyme (0.125 mg/mL polymer, 2.5 mg/mL protein, 50 mM phosphate buffer, pH 7.5)

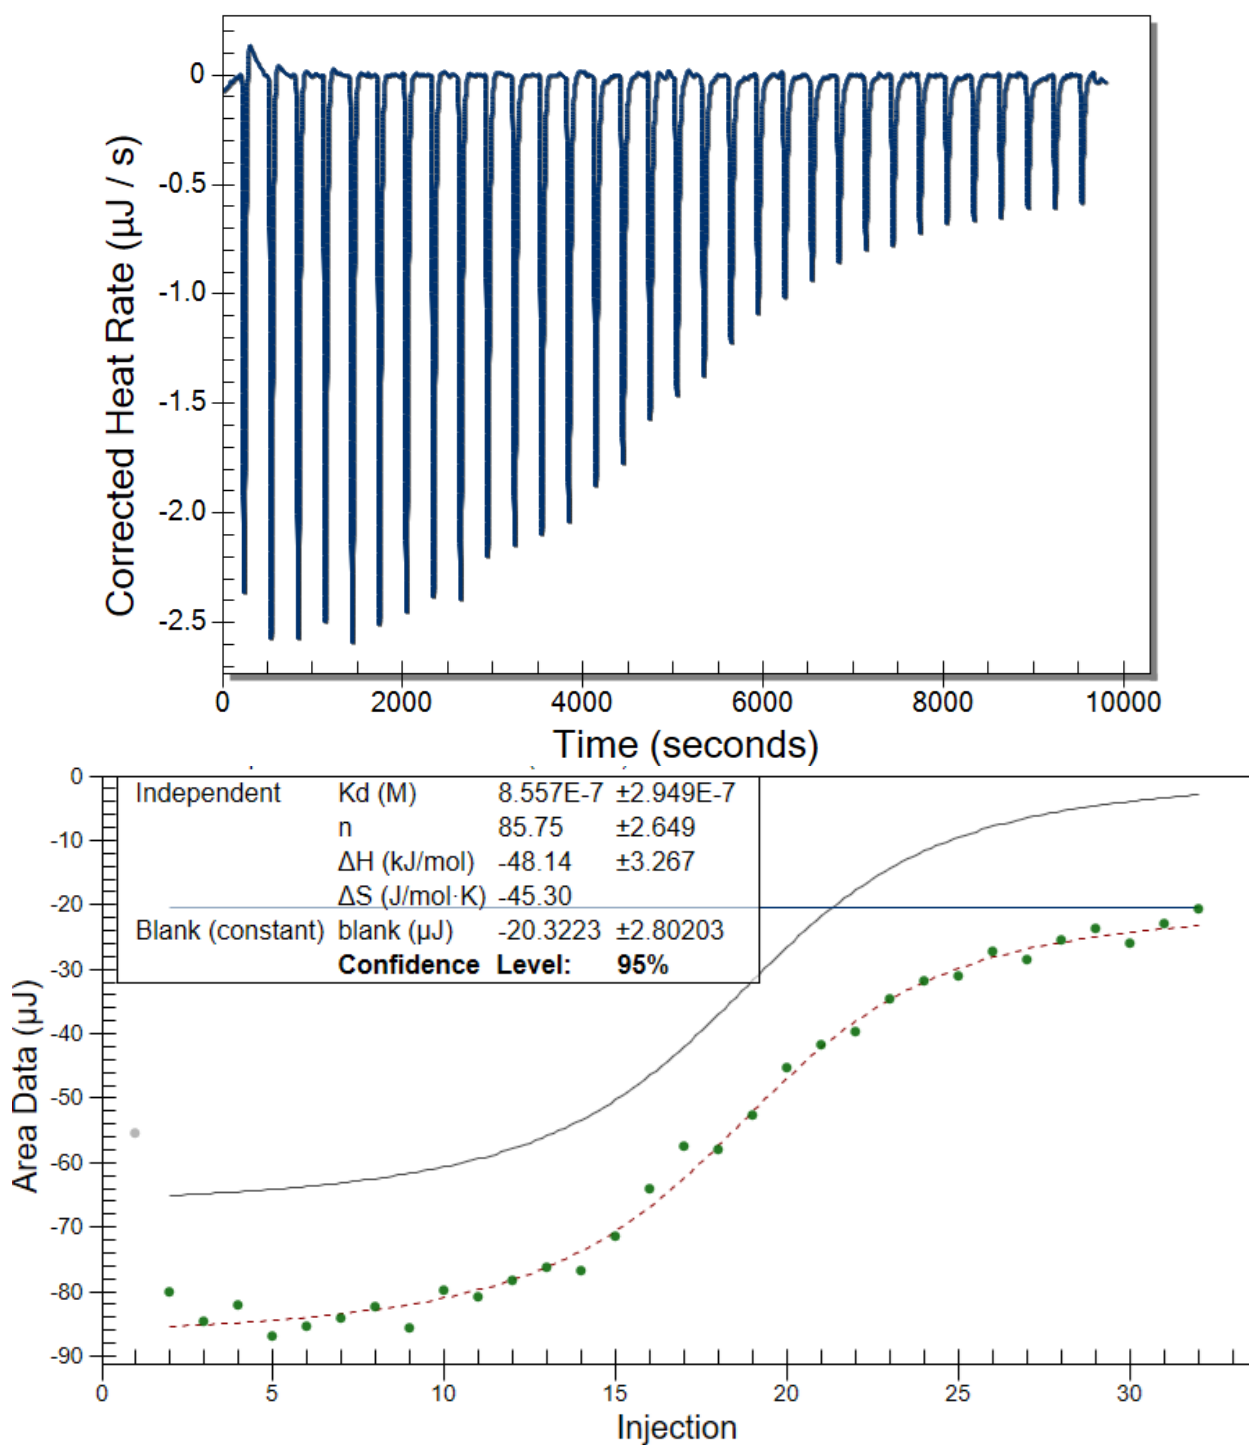

**Fig. S3.** ITC titration of PCPP-PEG2 with lysozyme (0.125 mg/mL polymer, 2.5 mg/mL protein, 50 mM phosphate buffer, pH 7.5)

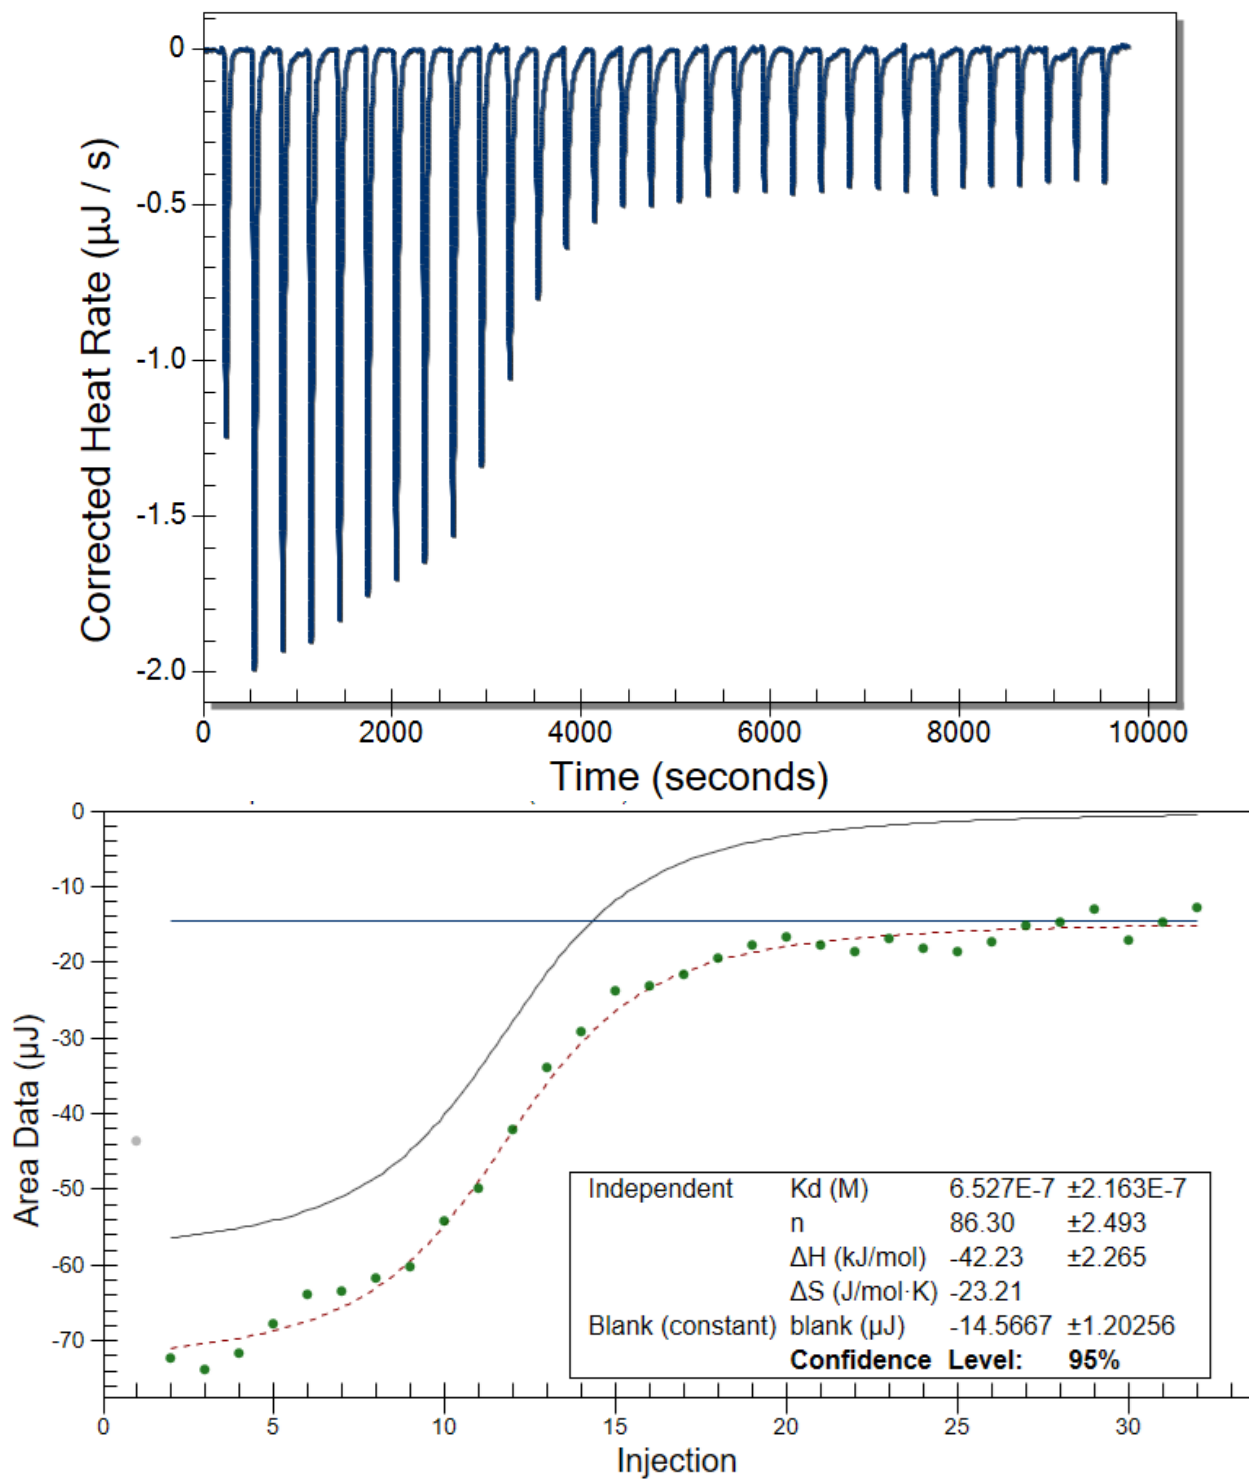

**Fig. S4.** ITC titration of PCPP-MEEP with lysozyme (0.125 mg/mL polymer, 2.5 mg/mL protein, 50 mM phosphate buffer, pH 7.5)

**Table S1.** Assessment of apparent distances between adjacent charges in PCPP-PEG2 and PCPP-MEEP copolymers

| Polymer   | MW <sup>a</sup><br>(kDa) | mw <sub>r</sub> <sup>b</sup> | N <sup>c</sup> | e <sup>d</sup> | L <sup>e</sup><br>(Å) | b <sup>f</sup><br>(Å) |
|-----------|--------------------------|------------------------------|----------------|----------------|-----------------------|-----------------------|
| PCPP-PEG2 | 360                      | 521                          | 691            | 1353           | 2182                  | 1.6                   |
| PCPP-MEEP | 600                      | 305                          | 1967           | 1967           | 6216                  | 3.2                   |

<sup>a</sup> Molecular weight of the polymer; <sup>b</sup> molecular weight of the polymer repeat unit; <sup>c</sup> degree of polymerization; <sup>d</sup> number of elementary charges (carboxylate ions) per polymer chain; <sup>e</sup> polymer counter chain length - calculated assuming 1.58 as the average length of polyphosphazene skeleton bond (H. R. Allcock, *Chemistry and Applications of Polyphosphazenes*, Wiley, Hoboken, NJ, 2002, page 405); <sup>f</sup> apparent distance between adjacent charges in the polymer chain ( $b=L/e$ ).

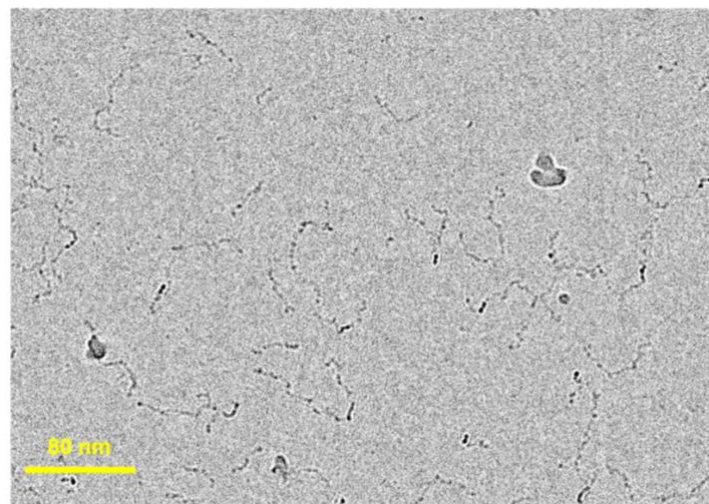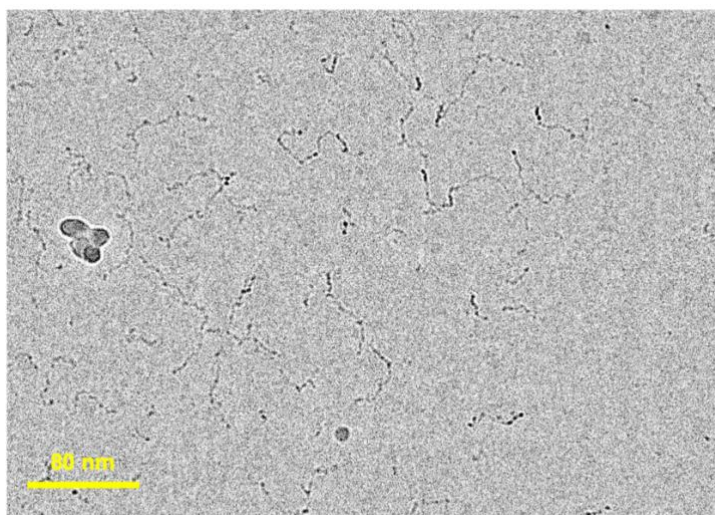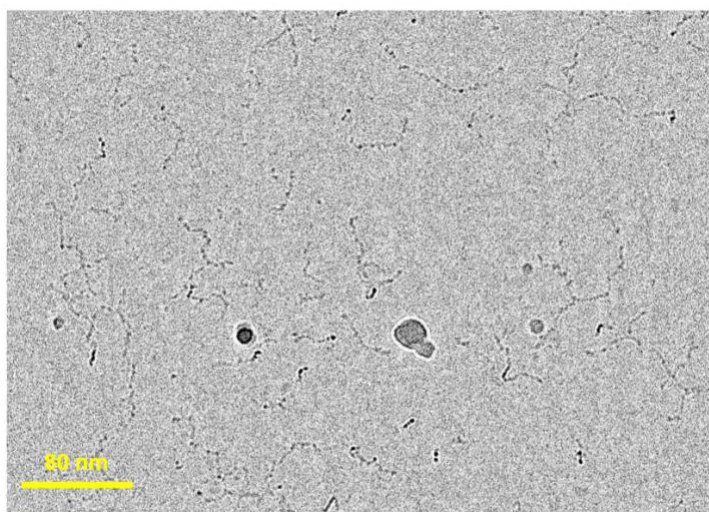

**Fig. S5.** cryoEM images of PCPP-PEG2 (0.25 mg/mL polymer, 50 mM phosphate buffer).

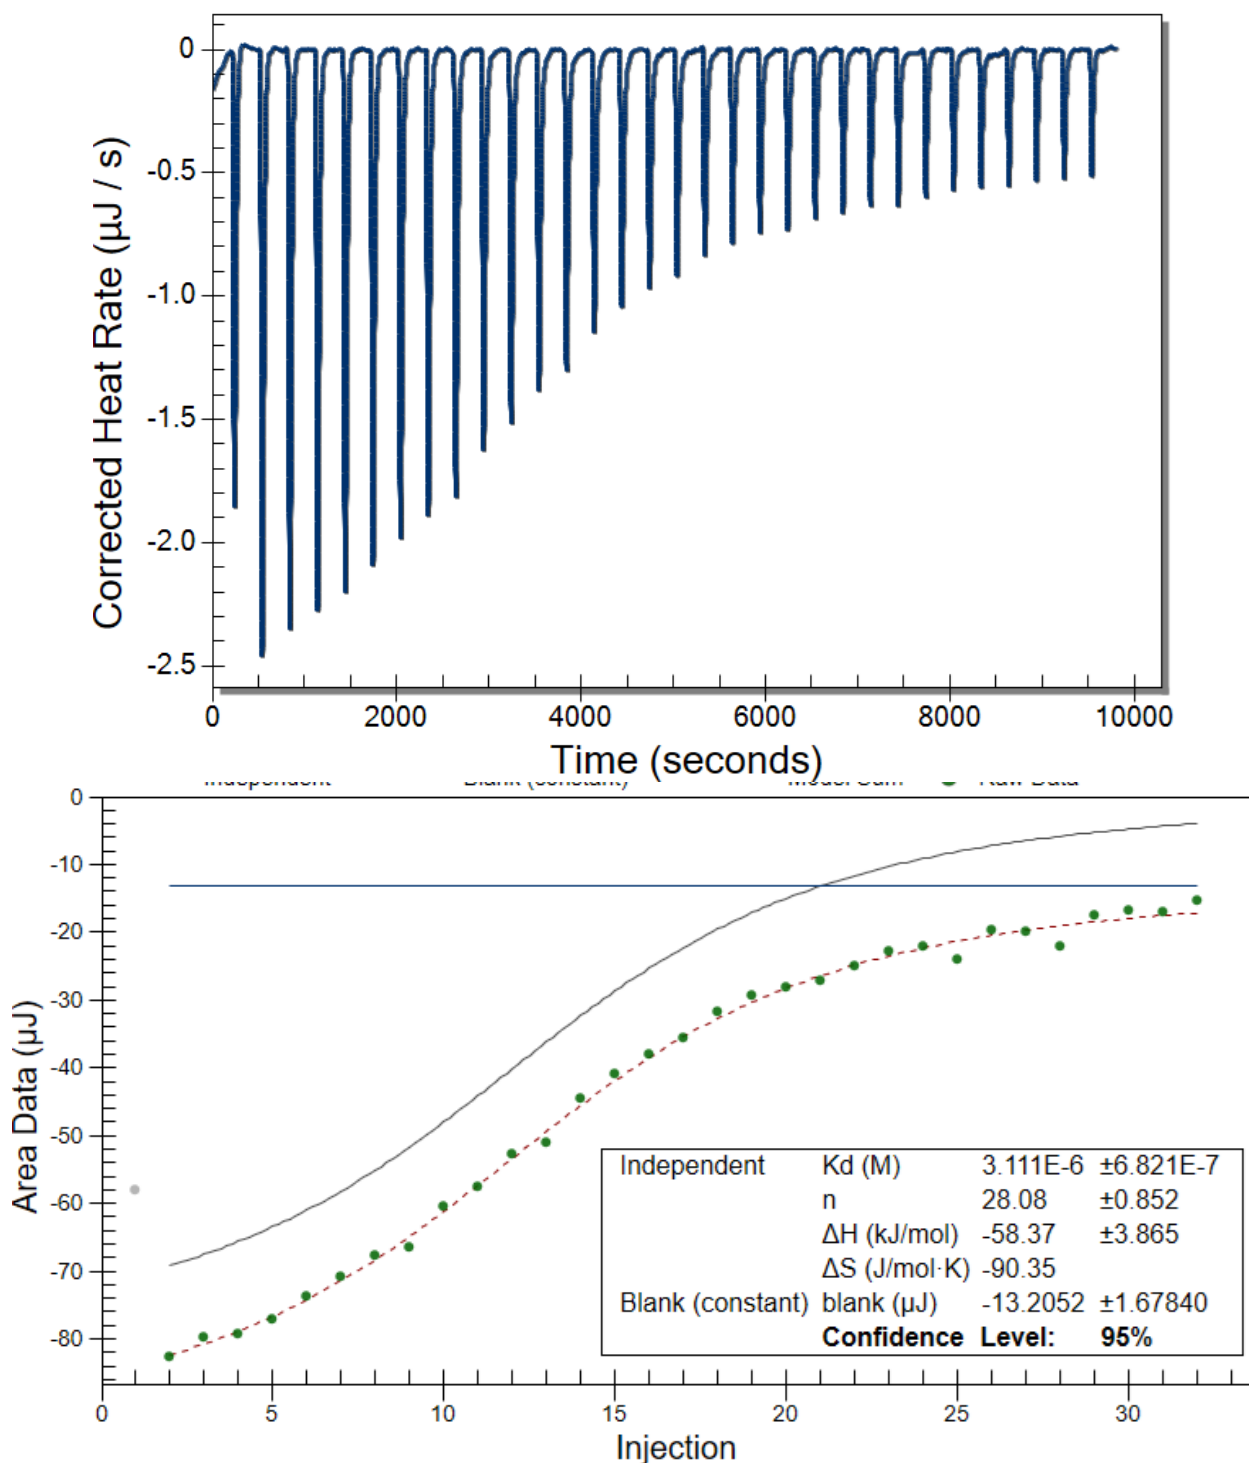

**Fig. S6.** ITC titration of PCPP-PEG4 with lysozyme (0.125 mg/mL polymer, 2.5 mg/mL protein, 50 mM phosphate buffer, pH 7.5)



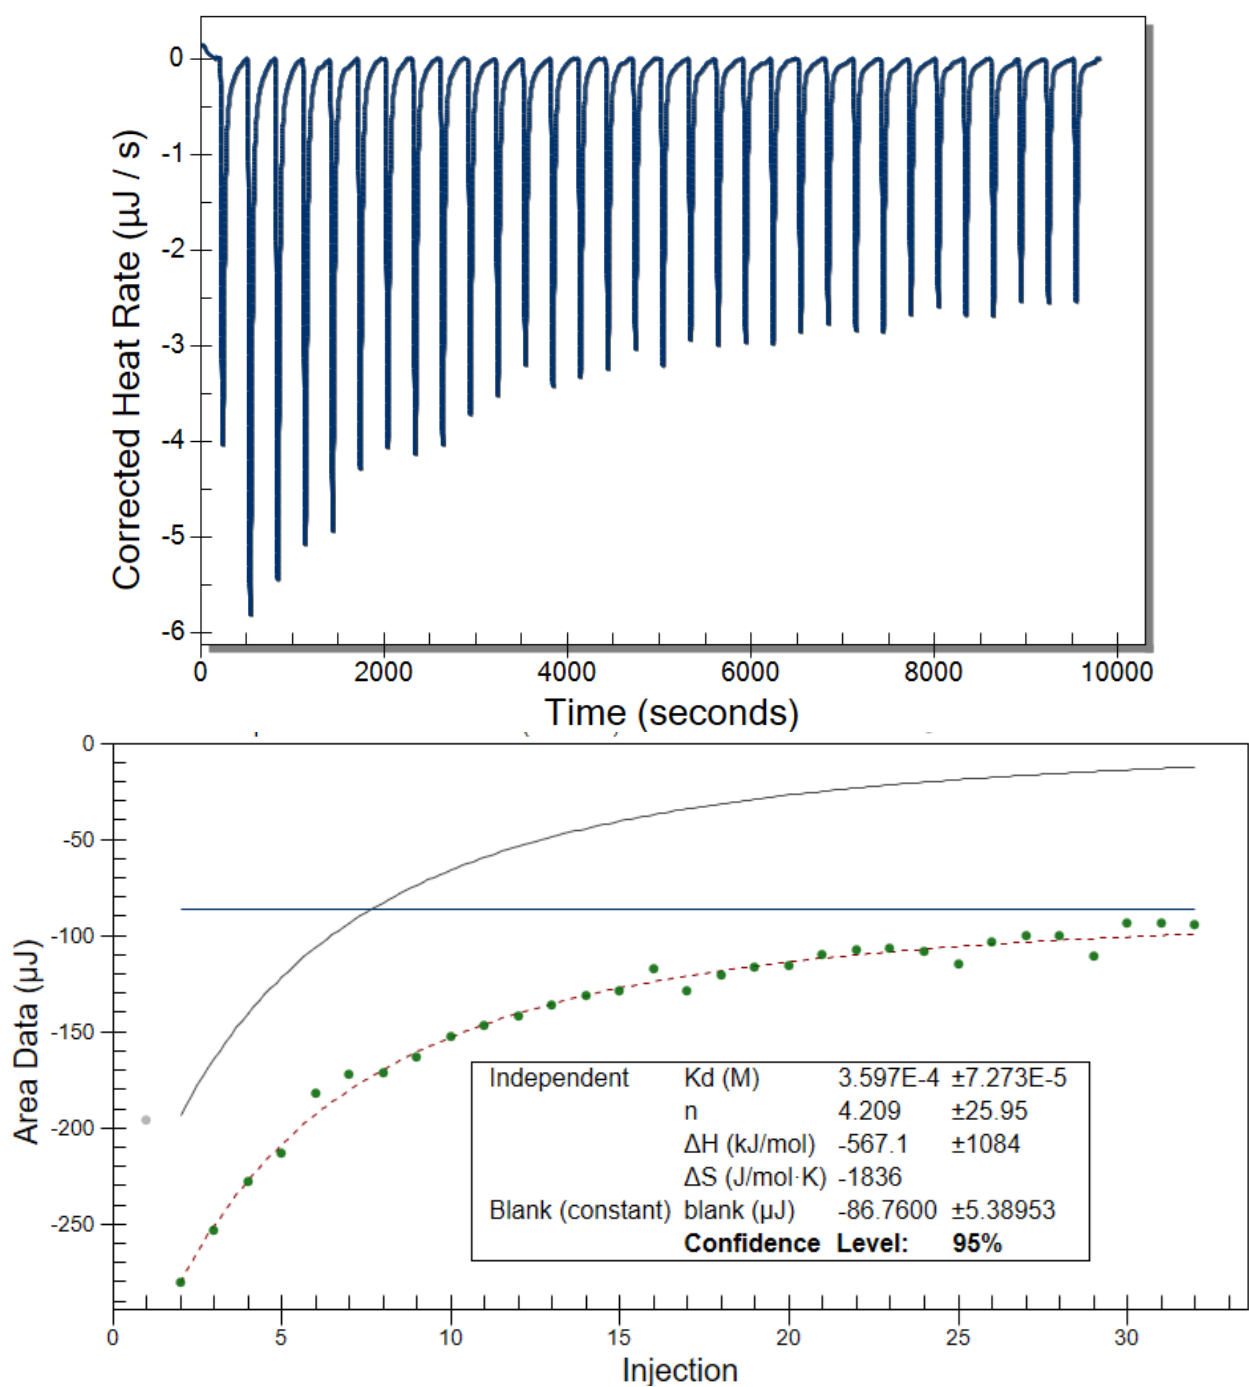

**Fig. S7.** ITC titration of PCPP with PEG (1 mg/mL PCPP, 20 mg/mL PEG (5 kDa), 50 mM phosphate buffer, pH 7.5)

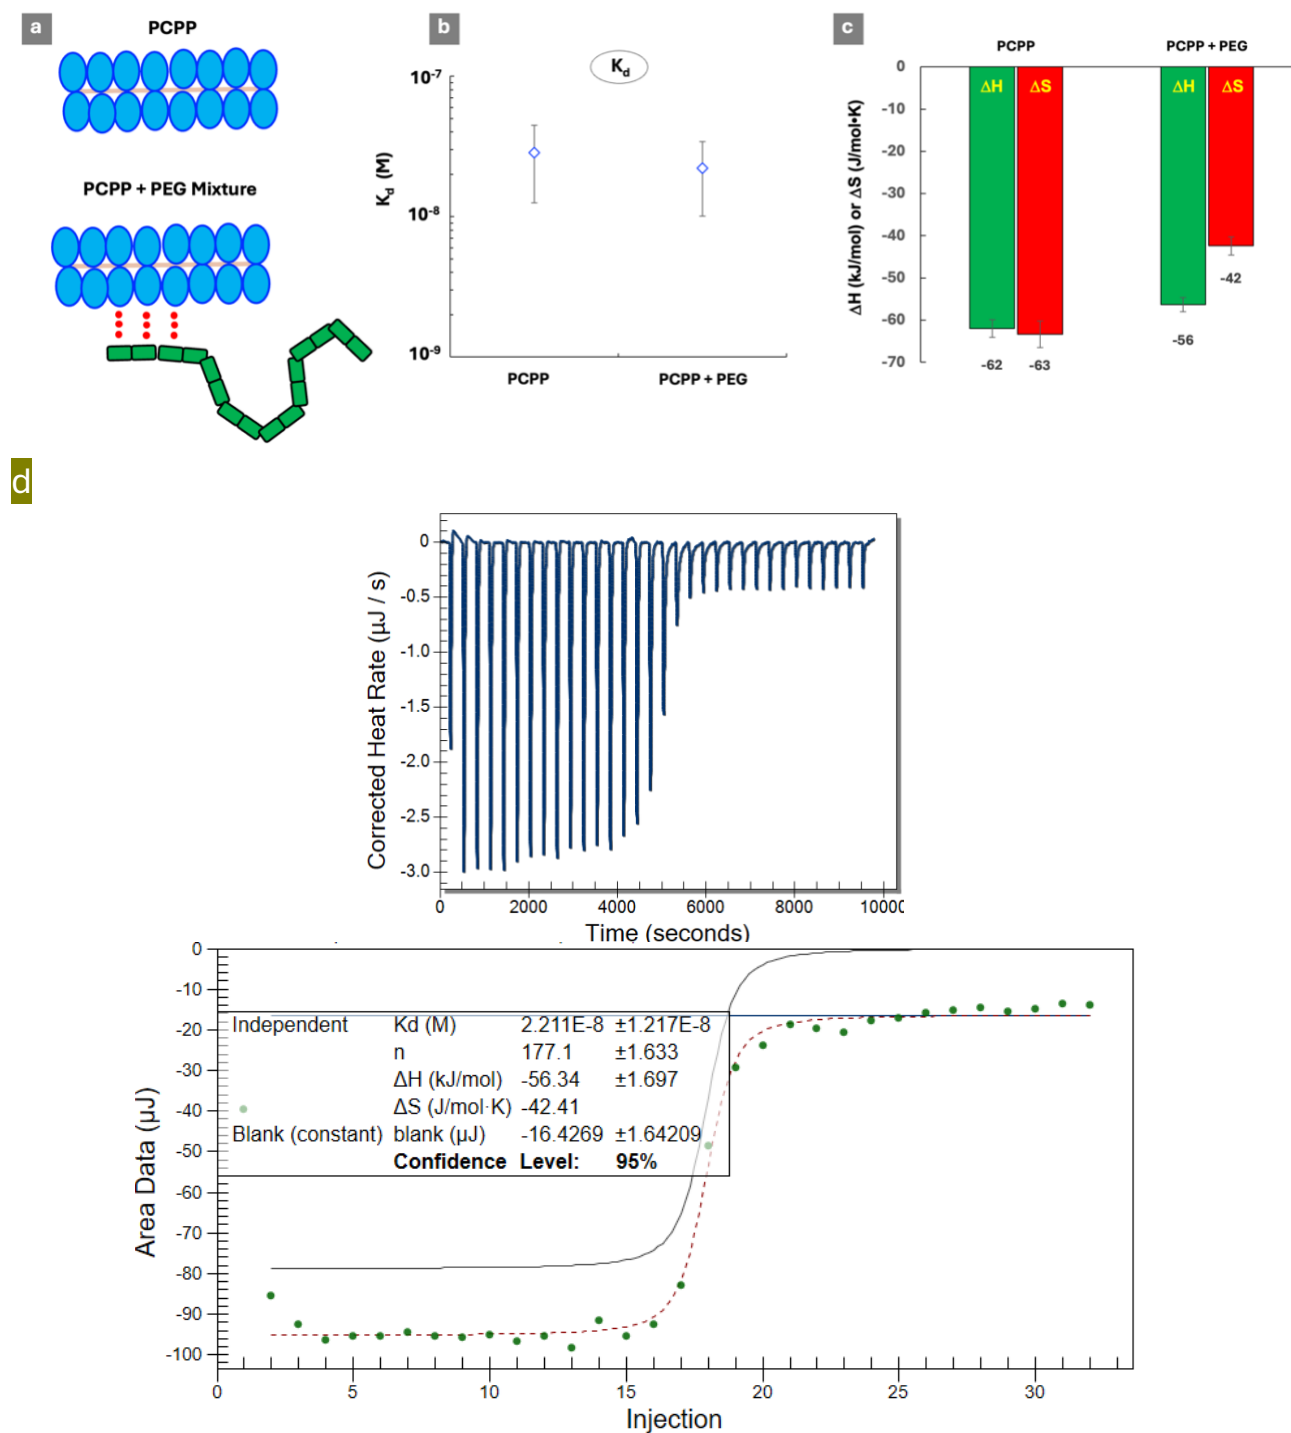

**Fig. S8.** ITC titration of PCPP and PEG mixture with lysozyme: (a) schematic of PCPP-PEG interactions via formation of hydrogen bonds, comparison of (b) dissociation constants of PCPP – lysozyme and (c) thermodynamic patterns of polymer-protein interactions in the absence and presence of PEG and (d) ITC raw data (0.125 mg/mL polymer, 0.1 mg/mL PEG (5kDa), 2.5 mg/mL protein, 50 mM phosphate buffer, pH 7.5)

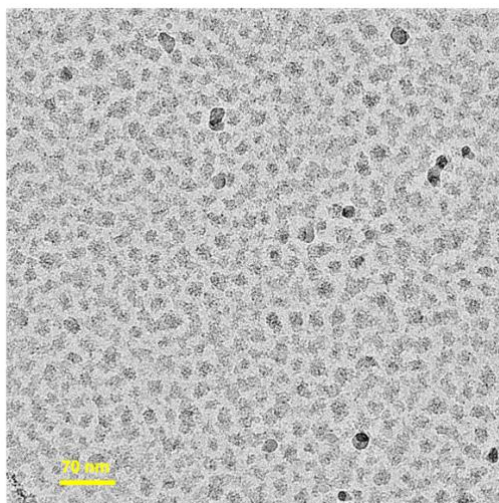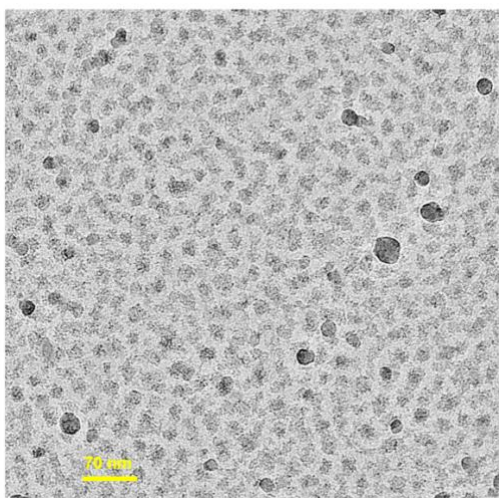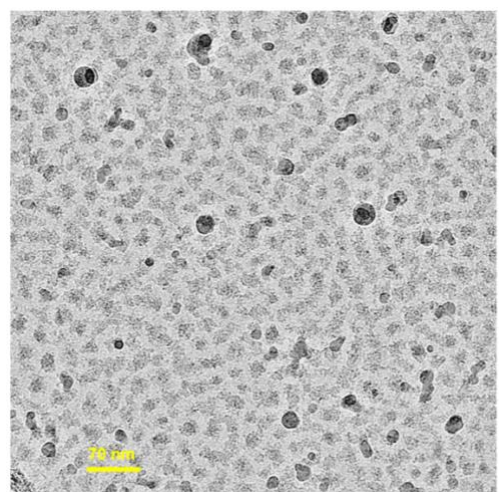

**Fig. S9.** CryoEM images of PCPP-PEG2 cross-linked with spermine (1 mg/mL PCPP-PEG2, 1mg/mL spermine, 50 mM phosphate buffer, pH 7.4)

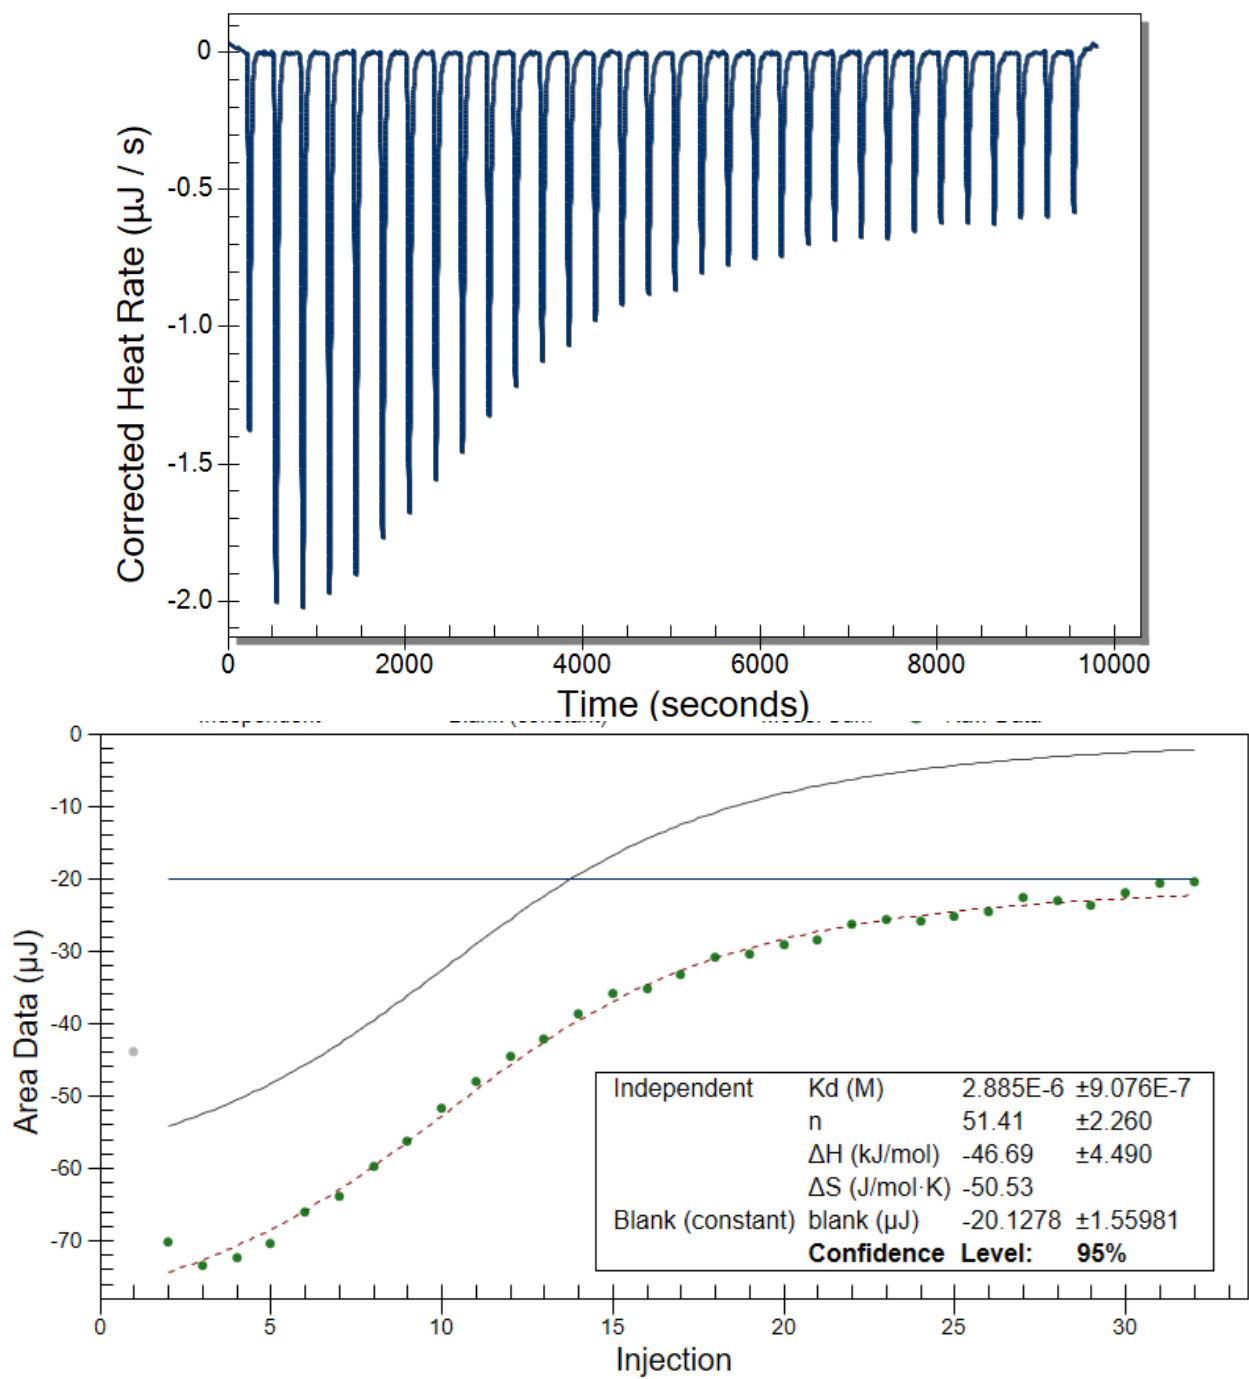

**Fig. S10.** ITC titration of spermine cross-linked PCPP-PEG2 (NG-01) with lysozyme (0.125 mg/mL nanogel, 2.5 mg/mL protein, 50 mM phosphate buffer, pH 7.5)

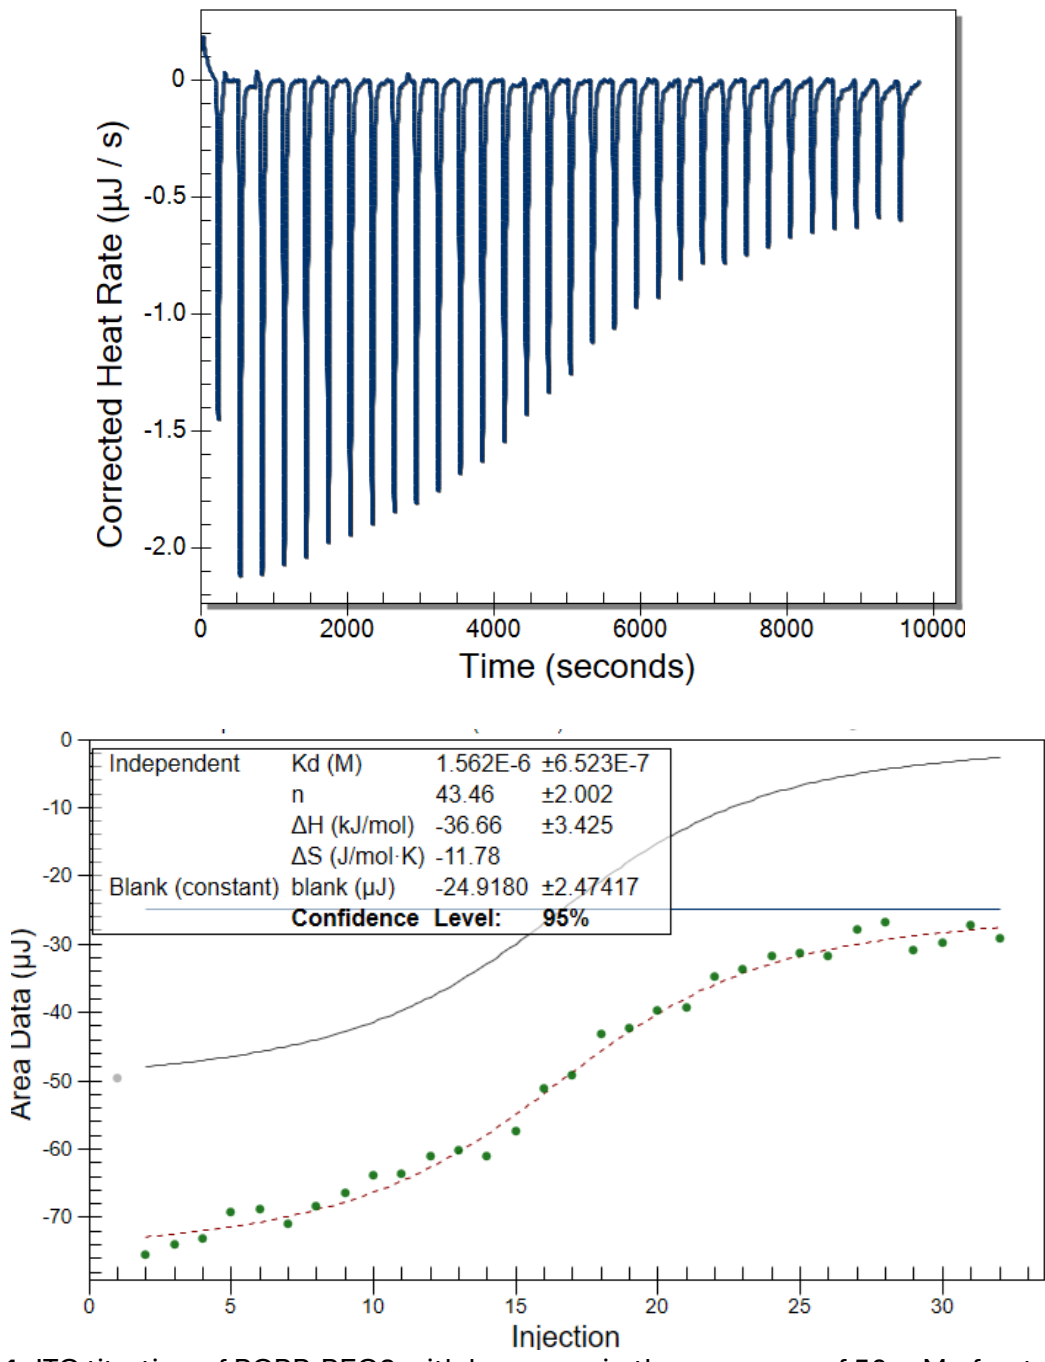

**Fig. S11.** ITC titration of PCPP-PEG2 with lysozyme in the presence of 50 mM of potassium chloride (0.125 mg/mL polymer, 2.5 mg/mL protein, 50 mM phosphate buffer, pH 7.5)

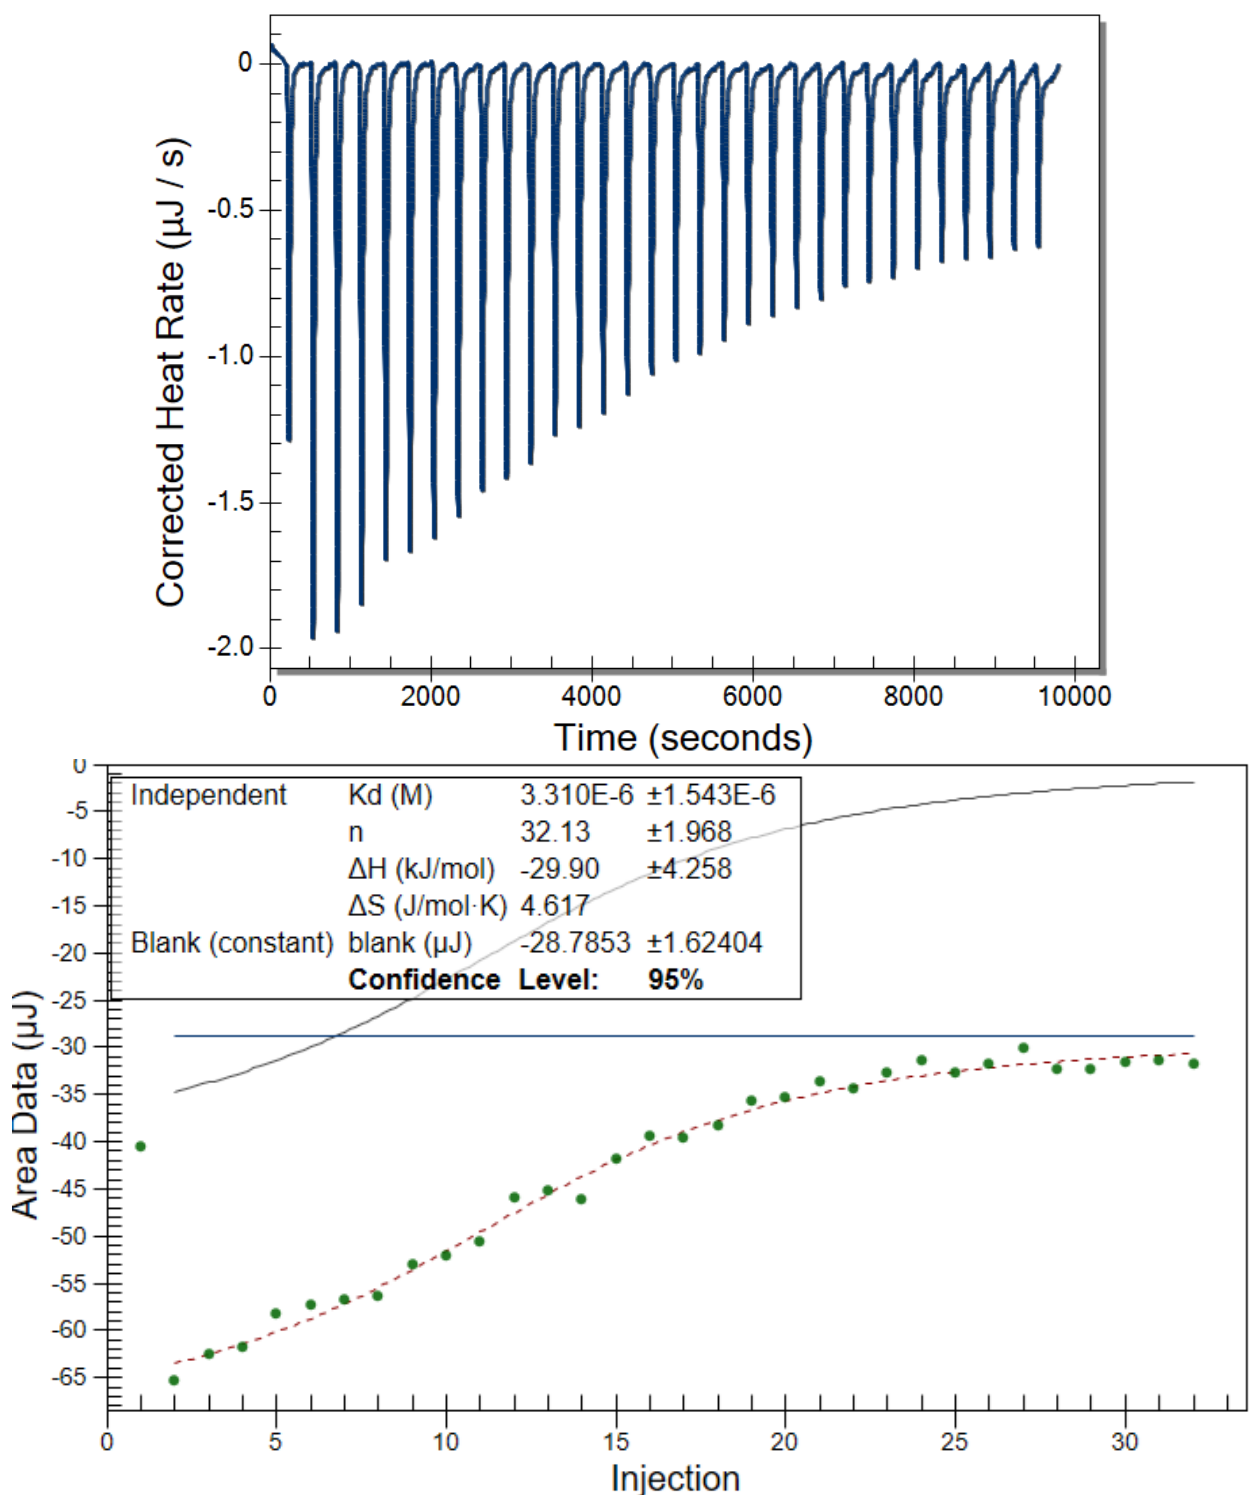

**Fig. S12.** ITC titration of PCPP-PEG2 with lysozyme in the presence of 100 mM of potassium chloride (0.125 mg/mL polymer, 2.5 mg/mL protein, 50 mM phosphate buffer, pH 7.5)
